# Supplementary material
Source: Springer Nature journal article supplement (https://www.springermedizin.de/resource/supplementary/12985_2014_2488_MOESM10_ESM.pdf/9606862)

**A****Brainstem-Cerebellum**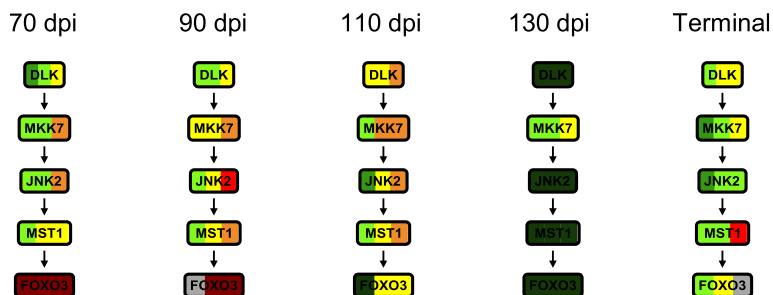**Expression Level**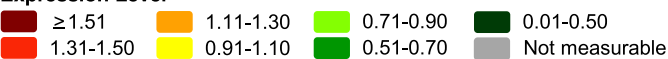**B****Brainstem-Cerebellum**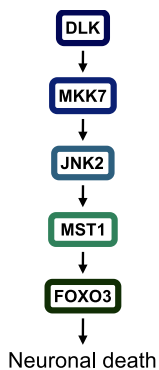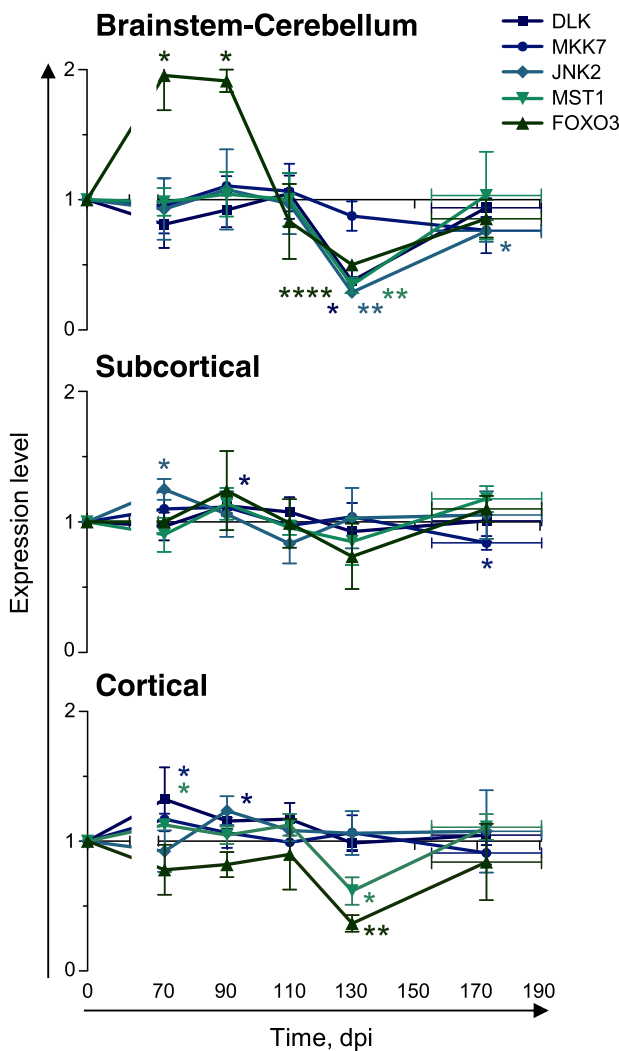

Supplement: MOESM10 [file 9606862]
